# Supplementary material
Source: Elsevier journal article supplement (https://www.sciencedirect.com/science/article/pii/S0211699515002192)
Supplement: mmc1 [file S0211699515002192:mmc1.doc]

**ANEXO.** Investigadores colaboradores en el estudio multicéntrico español PIBHE.

ANDALUCIA

1. Mª Dolores del Pino (Hospital Torrecárdenas, Almería)
2. Mª Adoración Martín Gómez (Hospital de Poniente, El Ejido, Almería)
3. Macarena Navarro (Centro Hemo BBRAUN, Arcos de la Frontera, Cádiz)
4. Carolina Lancho (Centro Hemo BBRAUN, Chiclana de la Frontera, Cádiz)
5. (Hospital General Jerez de la Frontera, Cádiz)
6. Mª Mar García Crespo (Centro de Diálisis FMC, Jerez de la Frontera, Cádiz)
7. (Hospital Universitario de Puerto Real, Puerto Real, Cádiz)
8. Marisa Alcalá Rueda (Centro de Diálisis FMC, Sanlúcar de Barrameda, Cádiz)
9. (Centro de Hemodiálisis San Rafael, Córdoba)
10. María Peña Ortega, Mª José Torres y Ana Isabel Morales (Centro de Diálisis Nevada, Granada)
11. (Hospital Clínico San Cecilio, Granada)
12. Antonio Osuna (Hospital Virgen de la Nieves, Granada)
13. (Hemodiálisis Nefrobaza, Baza, Granada)
14. (Centro de Diálisis Nuestra Señora de la Cabeza, Motril, Granada)
15. Manuel Benítez Sánchez (Hospital Juan Ramón Jiménez, Huelva)
16. (Centro de Diálisis Costa de la Luz, Huelva)
17. Marisa Vidal Blandino (Centro de Diálisis Minas de Río Tinto, Río Tinto, Huelva)
18. Francisca Hermosilla (Centro de Diálisis Playa de la Victoria, Úbeda, Jaén)
19. (Centro de Diálisis Ciudad Jardín, Málaga)
20. (Centro de Diálisis FMC Antequera, Antequera, Málaga)
21. (Centro de Diálisis Estepona, Estepona, Málaga)
22. (Hospital Costa del Sol, Marbella, Málaga)
23. (Hospital Axarquía, Torre del Mar, Málaga)
24. Elena Jiménez Víbora y Nuria del Toro Espinosa (Centro de Diálisis Sierra Este, Sevilla)
25. (Clínica Santa Isabel, Sevilla)
26. Rosario Barrera (Centro de Diálisis FMC Osuna, Sevilla)

ARAGÓN

1. Rafael C. Virto Ruíz (Hospital General San Jorge, Huesca)
2. (Hospital Comarcal Barbastro, Huesca)
3. (Hospital Obispo Polando, Teruel)
4. (Centro de Diálisis Amex, Alcañíz, Teruel)
5. (Hospital Clínico Lozano Blesa, Zaragoza)
6. Jesús Pérez (Hospital Miguel Servet, Zaragoza)
7. (Hospital de la Defensa, Zaragoza)
8. (Hospital San Juan de Dios, Zaragoza)
9. (Hospital Ernest Lluch, Calatayud, Zaragoza)

ASTURIAS

1. Pedro Vidau (Hospital Universitario Central Asturias, Oviedo)
2. (Hospital Francisco Grande Covián, Arriondas, Oviedo)
3. (Hospital San Agustín, Avilés, Oviedo)
4. (Hospital de Cabueñes, Gijón, Oviedo)
5. Julia Mejido Moro (Hospital de la Cruz Roja, Gijón)
6. (Hospital Valle del Nalón, Riaño-Langreo, Oviedo)

CANTABRIA

1. (Dialsan SL, Santander)
2. Ángel Martín de Francisco (Hospital Marqués de Valdecilla ,Santander)

CASTILLA LA MANCHA

1. Agustín Cerrato (Clínica de Diálisis Asyter Albacete, Albacete)
2. Carmen Gómez Roldán (Hospital General de Albacete, Albacete)
3. (Diálisis Amex, Ciudad Real)
4. Isabel Ferreras y Sara Anaya (Hospital General de Ciudad Real)
5. Emilsi Trinidad Pérez, Lidia Contreras Pedroche, Mª Isabel Guijarro Alfaro y Laura Arias Mora (Clínica de Diálisis Asyter Alcázar de San Juan, Ciudad Real)
6. Maribel Monroy Condori y Eduardo Martín-Sonseca Prieto (Centro de Diálisis Asyter Puertollano, Ciudad Real)
7. Laura Giera Vives y Cristina Martínez Asensio (Centro de Diálisis Asyter Cuenca, Cuenca)
8. Javier Usón (Hospital Virgen de la Luz, Cuenca)
9. Beatriz Hernández Sevillano (Hospital Universitario de Guadalajara, Guadalajara)
10. José Antonio Herruzo (Centro de Diálisis Asyter Toledo, Toledo)
11. Rafael Díaz-Tejeiro Izquierdo (Hospital Virgen de la Salud, Toledo)
12. José Antonio Herruzo (Centro de Diálisis Asyter Talavera, Talavera de la Reina, Toledo)

CASTILLA LEÓN

1. J. C. Chacón Unzué (Hospital Nuestra Señora de Sonsoles, Ávila)
2. (Centro de Diálisis FMC, Aranda de Duero, Burgos)
3. Pedro Agaibar (Hospital Santiago Apostol, Miranda de Ebro, Burgos)
4. Jorge Ksasbji (Complejo Hospitalario de León, León)
5. (Centro de Diálisis FMC León, León)
6. (Hospital de El Bierzo, León)
7. Fernando Sousa Pérez y Victoria Oviedo Gómez (Hospital Río Carrión, Palencia)
8. Miguel Ángel Terleira Borja (Centro de Diálisis Las Encinas, Ciudad Rodrigo, Salamanca)
9. Miguel Ángel Terleira Borja (Centro de Diálisis El Castañar, Béjar, Salamanca)
10. (Centro de Diálisis Los Olmos, Segovia)
11. Rosa Sánchez Hernández (Complejo Hospitalario de Segovia, Segovia)
12. Marcos Álvarez Alejandre (Hospital General de Soria, Soria)
13. Jesús María Núñez García (Hospital Clínico Universitario Valladolid, Valladolid)
14. I. Pérez (Centro de Diálisis FRIAT Los Pinos, Medina del Campo, Valladolid)
15. F. Valentín (Centro de Diálisis FMC Valladolid, Valladolid)
16. (Centro de Diálisis Benavente, Benavente, Zamora)

CATALUÑA

1. (Centro de Diálisis Nephros, Barcelona)
2. Mercedes Pons (Centro de Diálisis FMC Barcelona-Morales, Barcelona)
3. Mª Jesús Lloret Cora y Patricia Lescano (Fundación Puigvert, Barcelona)
4. Marta Arias y Francisco Maduell (Hospital Clìnic i Provincial, Barcelona)
5. (Hospital Vall d´Hebron, Barcelona)
6. (Instituto de Hemodiálisis, Barcelona)
7. Loreto Fernández Lorente (Hospital Universitario Germans Trias i Puyol, Badalona, Barcelona)
8. (Institut Mèdic Badalona, Diaverum, Servicios Renales, Barcelona)
9. (Centre de Diàlisis del Baix Llobregat, L´Hospitalet de Llobregat, Barcelona)
10. Miguel Hueso (Hospital Universitari de Bellvitge, L´Hospitalet de Llobregat, Barcelona)
11. (Centro de Diálisis FMC L´Hospitalet, L´Hospitalet de Llobregat, Barcelona)
12. (Consorci Sanitari de L´Anoia, Igualada, Barcelona)
13. (Centro de Diálisis Maresme, Pineda del Mar, Barcelona)
14. (Centro de Diálisis de Mataró, Mataró, Barcelona)
15. (Hospital de Mollet, Mollet, Barcelona)
16. (Consorci Parc Taulí, Sabadell, Barcelona)
17. Pilar Ruíz (Hospital Moisés Broggi, Sant Joan Despí, Barcelona)
18. (Centro de Diálisis FMC Terrassa, Terrassa, Barcelona)
19. Fátima Moreno Guzmán y Miquel Fulquet Nicolás (Consorci Sanitari de Terrassa, Terrassa, Barcelona)
20. (Centro de Diálisis FMC Vilanova i La Geltrú, Vilanova i La Geltrú, Barcelona)
21. (Fundació Salut Empordá, Gerona)
22. (Hospital Doctor Josep Trueta, Gerona)
23. José Felipe Sarró Sobrin (Hospital Arnau de Vilanova, Lérida)
24. (Sistemes Renal, Lérida)
25. (Hospital Joan XXIII, Tarragona)
26. (Centro de Diálisis FMC Reus, Reus, Tarragona)
27. (Centro de Diálisis FMC Tarragona, Tarragona)
28. (Hospital de la Santa Creu, Tortosa, Tarragona)

CEUTA

1. Mazine Bennouna (Centro de Diálisis FMC Ceuta, Ceuta)

EXTREMADURA

1. (Centro de Diálisis FMC Badajoz, Badajoz)
2. (Hospital Infanta Cristina, Badajoz)
3. (Hospital Perpetuo Socorro, Badajoz)
4. Mª Teresa Calderón Morales (Complejo Hospitalario Llerena-Zafra, Badajoz)
5. (Centro de Diálisis FMC Mérida, Badajoz)
6. (Centro de Diálisis FMC Villanueva, Villanueva de la Serena, Badajoz)
7. (Hospital San Pedro de Alcántara, Cáceres)
8. (Centro de Diálisis FMC Coria, Coria, Cáceres)
9. Juan Villa Rincón (Centro de Diálisis FMC Navalmoral de la Mata, Navalmoral de la Mata, Cáceres)
10. (Centro de Diálisis FMC Cáceres, Cáceres)
11. (Centro de Diálisis FMC Plasencia, Plasencia, Cáceres)

GALICIA

1. Teresa García Falcón (Complejo Hospitalario Universitario La Coruña, La Coruña)
2. (Hospital Virxe da Xunqueira, Cee, La Coruña)
3. (Hospital General Juan Cardona, El Ferrol, La Coruña)
4. Dolores Guimil Carbajal (Hospital Do Barbanza Ribeira, La Coruña)
5. (Hospital La Rosaleda, Santiago de Compostela, La Coruña)
6. (Clínica Doctor Souto Boo, Santiago de Compostela, La Coruña)
7. Cándido Díaz Rodríguez (Hospital Clínico Universitario Santiago de Compostela, Santiago de Compostela, La Coruña)
8. (Centro de Diálisis Avitum Galicia, Lugo)
9. Gerardo García-Trio Blanco (Hospital Universitario Lucus Augusti, Lugo)
10. Dra. Pousa Ortega (Hospital da Costa Burela, Lugo)
11. Nicanor Danty León (Centro de Diálisis Avitum Galicia, Monforte de Lemos, Lugo)
12. (Centro de Diálisis de Pontevedra, Orense)
13. Mª Jesús Camba Caride (Complejo Hospitalario Cristal-Piñor, Orense)
14. (Hospital Comarcal O Barco de Valdeorras, Orense)
15. (Complejo Hospitalario de Pontevedra, Vigo)
16. (Centro de Hemodiálisis Os Carballos, Vigo)
17. (Hospital Provincial de Pontevedra, Vigo)
18. (Hospital Xeral de Vigo, Vigo)
19. (Centro de Diálisis de Villagarcía, Villagarcía de Arousa, Vigo)

BALEARES

1. (Centro de Diálisis Nefdial, Palma de Mallorca)
2. (Policlínica Miramar, Palma de Mallorca)
3. Antonio Francisco Planas Pons (Hospital Comarcal Inca, Inca, Palma de Mallorca)
4. (Centro de Diálisis Nefdial Inca, Inca, Palma de Mallorca)
5. (Hospital Son Llatzer, Palma de Mallorca)
6. (Hospital Can Misses, Ibiza)

CANARIAS

1. (Club de Hemodiálisis Lanzarote, Lanzarote)
2. (Hospital General de Fuerteventura, Fuerteventura)
3. (Club de Hemodiálisis Maspalomas, Tenerife)
4. (Hospital Doctor José Molina Orosa, Arrecife, Lanzarote)
5. Eduardo Baamonte (Club de Diálisis Dialsur Teide, Las Palmas)
6. Tania Monzón Vázquez y Beatriz Escamilla Cabrera (Quirón Tenerife, Santa Cruz de Tenerife)
7. (Centro de Diálisis FMC Santa Cruz de Tenerife, Santa Cruz de Tenerife)
8. (Hospiten Sur, Arona, Santa Cruz de Tenerife)
9. Virginia Domínguez Pimentel, Mª Luisa Méndez Pérez y Eduardo Gallego Mora-Esperanza (Hospital Universitario Nuestra Señora de la Candelaria, Santa Cruz de Tenerife)
10. (Hospiten Tamaragua, Puerto de la Cruz, Santa Cruz de Tenerife)
11. (Hospital General de La Palma, Breña Alta-La Palma)
12. (Hospital Nuestra Señora de los Reyes, Valverde-El Hierro, El Hierro)
13. (Hospital Insular Nuestra Señora de Guadalupe, San Sebastián de la Gomera, La Gomera)

MADRID

1. (Centro de Hemodiálisis Los Enebros, Madrid)
2. (Centro de Diálisis FMC Madrid-El Pilar, Madrid)
3. (Centro de Diálisis FMC San Luciano, Madrid)
4. Yésika Amézquita (Clínica de la Fuensanta, Madrid)
5. (Centro de Diálisis FMC Dialcentro, Madrid)
6. Amir Shabaka Fernández y José Antonio Herrero Calvo (Hospital Clínico San Carlos, Madrid)
7. Guillermina Barril Cuadrado (Hospital Universitario La Princesa, Madrid)
8. Rafael Jesús Sánchez (Hospital La Paz, Madrid)
9. Milagros Fernández Lucas y José Luis Teruel Briones (Hospital Universitario Ramón y Cajal, Madrid)
10. Khatuna Ahmaladze (Unidad de Diálisis Madrid Oeste, Madrid)
11. José Ramón Berlanga Alvarado (Centro de Diálisis FMC Moncloa, Madrid)
12. Hannane Bouarich y Javier Mancha Ramos (Hospital Príncipe de Asturias, Alcalá de Henares, Madrid)
13. Eduardo Gallego y Javier Villacorta (Hospital de Alcorcón, Alcorcón, Madrid)
14. Beatriz Gil Casares (Hospital del Suereste, Arganda del Rey, Madrid)
15. (Hospital Severo Ochoa, Leganés, Madrid)
16. Rocío Zamora González-Mariño (Hospital Infanta Cristina, Parla, Madrid)
17. Silvia Caldés y A. Cirugeda (Hospital Infanta Sofía, San Sebastián de los Reyes, Madrid)
18. (Hospital Infanta Elena, Valdemoro, Madrid)

MELILLA

1. Dolores Martínez Esteban (Hospital Comarcal de Melilla, Melilla)

MURCIA

1. (Centro de Diálisis FMC Rondasur, Murcia)
2. (Centro de Diálisis FMC El Palmar, El Palmar, Murcia)
3. Margarita Cacho Pérez y Adoración Martínez Losa (Hospital General Universitario Virgen de la Arrixaca, El Palmar, Murcia)
4. (Centro de Diálisis FMC Caravaca, Caravaca, Murcia)
5. Susana Roca Meroño (Centro de Diálisis FMC Cartagena, Cartagena, Murcia)
6. Gracia María Álvarez Fernández (Hospital Universitario Santa Lucía, Cartagena, Murcia)
7. (Centro de Diálisis Lorca, Lorca, Murcia)
8. (Hospital Doctor Rafael Mendez, Lorca, Murcia)
9. (Centro de Diálisis FMC Molina de Segura, Molina de Segura, Murcia)
10. Cristina Jimeno Griñó (Centro de Diálisis FMC San Pedro del Pinatar, San Pedro del Pinatar, Murcia)
11. (Centro de Diálisis FMC Yecla, Yecla, Murcia)

NAVARRA

1. (Clínica Universitaria de Pamplona, Pamplona)

PAÍS VASCO

1. (Clínica Vírgen Blanca, Bilbao)
2. (Club de Diálisis Dial-Bilbao, Bilbao)
3. Mª Luisa Muñiz Gómez (Hospital de Cruces, Barakaldo, Vizcaya)
4. Jesús Montenegro Martínez (Hospital de Galdakao, Galdakao, Vizcaya)

RIOJA

1. (Centro de Diálisis FMC Logroño, Logroño)

COMUNIDAD VALENCIANA

1. (Clínica Vistahermosa, Alicante)
2. (Hospital Verge dels Lliris, Alcoi, Alicante)
3. (Clínica Benidorm, Benidorm, Alicante)
4. (Centro de Diálisis FMC Elche, Elche, Alicante)
5. (Hospital Perpetuo Socorro, Elche, Alicante)
6. (Centro de Diálisis FMC Orihuela, Alicante)
7. (Nefrodiálisis Levante, San Juan, Alicante)
8. (Centro de Diálisis Castellón, Castellón)
9. (Centro de Diálisis Nefroplana, Castellón)
10. Carmen María Pérez (Nefrovall SL, Vall d´Uxó, Castellón)
11. (Centro de Diálisis de Vinarós, Vinarós, Castellón)
12. (Casa de Salud Hospital Católico, Valencia)
13. Mª Dolores San Roque (Centro de Diálisis Valencia, Valencia)
14. Amparo Bernat y Javier Martín (Centro de Diálisis Nefroclub Diaverum, Valencia)
15. (Clínica Virgen del Consuelo, Valencia)
16. (Hospital Clínico Universitario , Valencia)
17. José Luis Lozano (Valnefron SL, Valencia)
18. (Centro de Diálisis FMC Levante, Valencia)
19. (Centro de Diálisis FMC Valencia, Valencia)
20. Antoni Brodils Gil (Cediat Aldaya Alcer-Turia, Valencia)
21. (Centro de Diálisis Burjassot, Burjassot, Valencia)
22. (Cediat Cullera, Cullera, Valencia)
23. (Centro de Diálisis FMC Gandía, Gandía, Valencia)
24. (Hospital San Francesc de Borja, Gandía, Valencia)
25. (Cediat Llíria, Valencia)
26. Amparo Sellés García y Rita Granchel (Nefro Ontinyent, Ontinyent, Valencia)
27. (Centro de Diálisis Sagunto, Puerto de Sagunto, Valencia)
28. (Cediat Hospital de Requena, Requena, Valencia)
29. (Cediat Torrent, Torrent, Valencia)
30. (Hospital Lluís Alcanys, Xátiva, Valencia)
